# Supplementary material for: The impact of COVID-19 on sexual risk behaviour for HIV acquisition in east Zimbabwe: An observational study
Source: PubMed Central journal article supplement (PMC11253984; doi:10.1371/journal.pgph.0003194), 2024-07-17
Supplement: pgph.0003194.s003.pdf [file pgph.0003194.s003.pdf]

S2 Fig. Participation and Eligibility flow diagram for the during Covid-19 survey round.

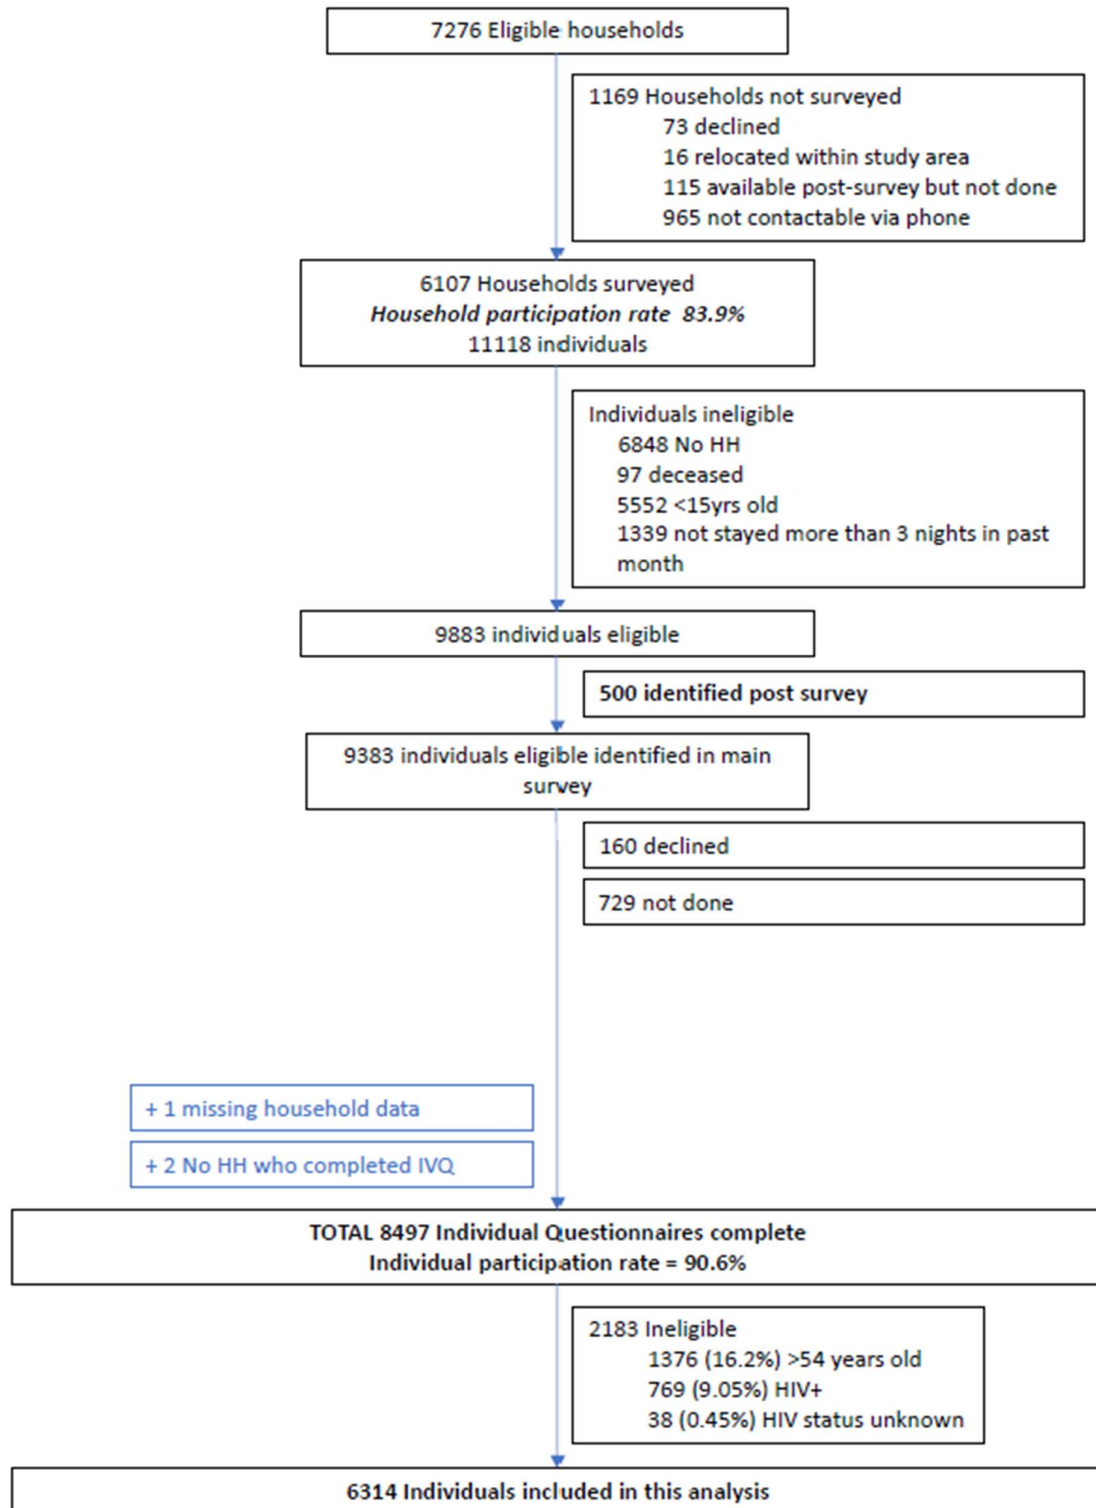

HHQ = household questionnaire  
IVQ = Individual questionnaire
