# Supplementary material for: The impact of COVID-19 on sexual risk behaviour for HIV acquisition in east Zimbabwe: An observational study
Source: PubMed Central journal article supplement (PMC11253984; doi:10.1371/journal.pgph.0003194), 2024-07-17
Supplement: pgph.0003194.s005.pdf [file pgph.0003194.s005.pdf]

S1 Table. Definitions of demographic characteristic variables.

|                                                           | <i>Survey Question(s)</i>                                                                                                                                                                                                                                                                                                                                                                                                                                                                                                                                                                                                                                                                                                                                                      | <i>Notes</i>                                                  |
|-----------------------------------------------------------|--------------------------------------------------------------------------------------------------------------------------------------------------------------------------------------------------------------------------------------------------------------------------------------------------------------------------------------------------------------------------------------------------------------------------------------------------------------------------------------------------------------------------------------------------------------------------------------------------------------------------------------------------------------------------------------------------------------------------------------------------------------------------------|---------------------------------------------------------------|
| <b>HIV status</b>                                         | See 2.1                                                                                                                                                                                                                                                                                                                                                                                                                                                                                                                                                                                                                                                                                                                                                                        |                                                               |
| <b>Marital Status</b>                                     | <p>Q: Have you ever been MARRIED or in a long-term or COHABITING relationship? *</p> <p>Q: Are you currently widowed, divorced or separated from your most recent spouse/partner?</p> <ul style="list-style-type: none"> <li>• <i>Widowed</i></li> <li>• <i>Divorced</i></li> <li>• <i>Separated</i></li> <li>• <i>Still in union</i></li> </ul>                                                                                                                                                                                                                                                                                                                                                                                                                               | Relationships of 12months or more were considered “long term” |
| <b>Household Wealth index</b>                             | See 2.2                                                                                                                                                                                                                                                                                                                                                                                                                                                                                                                                                                                                                                                                                                                                                                        |                                                               |
| <b>Highest Level of Education Achieved</b>                | <p>Q: How old were you when you left school?</p> <ul style="list-style-type: none"> <li>• never been to school = 99</li> </ul> <p>Q: What is the highest grade of school you have completed?</p> <ul style="list-style-type: none"> <li>• None</li> <li>• Primary</li> <li>• Secondary</li> <li>• Higher</li> </ul>                                                                                                                                                                                                                                                                                                                                                                                                                                                            |                                                               |
| <b>Employment</b>                                         | <p>Q: In which sector of employment do you work?</p> <ul style="list-style-type: none"> <li>• Estates: tea, coffee, forestry etc</li> <li>• Manufacturing or building trade</li> <li>• Police or army</li> <li>• Teacher: primary school or secondary school</li> <li>• Nurse or doctor</li> <li>• Services or retail shops</li> <li>• Informal: petty trading (veg etc)</li> <li>• Informal: subsistence agriculture</li> <li>• Student</li> <li>• Unemployed: excl. agriculture</li> <li>• Office worker</li> <li>• Other (specify)</li> </ul> <p>Q: What type of work do you do?</p> <ul style="list-style-type: none"> <li>• Professional or managerial</li> <li>• Self-employed: small business</li> <li>• Skilled labour</li> <li>• Manual / unskilled labour</li> </ul> |                                                               |
| <b>Currently enrolled in Education</b>                    | Q: Are you currently ENROLLED in school full-time?                                                                                                                                                                                                                                                                                                                                                                                                                                                                                                                                                                                                                                                                                                                             |                                                               |
| <b>Drank alcohol in the past year</b>                     | Q: Over the last 12 months, how many times per month, on average, have you had a drink containing alcohol?                                                                                                                                                                                                                                                                                                                                                                                                                                                                                                                                                                                                                                                                     |                                                               |
| <b>Visited bar, beerhall or shebeen in the past month</b> | Q: How many times have you visited a bar or beerhall or shebeen in the last month?                                                                                                                                                                                                                                                                                                                                                                                                                                                                                                                                                                                                                                                                                             |                                                               |
| <b>Using drugs for pleasure</b>                           | <p>Q: Do you take any of these types of drugs for pleasure?</p> <ol style="list-style-type: none"> <li>a) Injecting drugs</li> <li>b) Drugs you smoke</li> <li>c) Prescription Drugs</li> <li>d) Other drugs you swallow</li> </ol>                                                                                                                                                                                                                                                                                                                                                                                                                                                                                                                                            |                                                               |
