# Supplementary material for: The impact of COVID-19 on sexual risk behaviour for HIV acquisition in east Zimbabwe: An observational study
Source: PubMed Central journal article supplement (PMC11253984; doi:10.1371/journal.pgph.0003194), 2024-07-17
Supplement: pgph.0003194.s006.pdf [file pgph.0003194.s006.pdf]

S2 Table. Definitions of Covid-19 behaviours and responses variables.

|                                             | <i>Survey Question(s)</i>                                                                                                                                                                                                                                                                                                                                                                                                   | <i>Notes</i>                                                                                                                                                                     |
|---------------------------------------------|-----------------------------------------------------------------------------------------------------------------------------------------------------------------------------------------------------------------------------------------------------------------------------------------------------------------------------------------------------------------------------------------------------------------------------|----------------------------------------------------------------------------------------------------------------------------------------------------------------------------------|
| <b>Missed School due to Covid-19</b>        | Q: How many times in the last 12 months have you been unable to attend school for COVID-19-related reasons?                                                                                                                                                                                                                                                                                                                 | Answers of 1 or more were coded as 'yes' for this variable.                                                                                                                      |
| <b>Aware of 4 main symptoms of Covid-19</b> | Q; What are the main symptoms of the new coronavirus, COVID-19?<br><b>a) Fever</b><br><b>b) Cough -dry or productive</b><br>c) Tiredness<br>d) Muscle/joint pain<br>e) Shortness of breath<br>f) Runny or blocked nose<br>g) Sore throat<br><b>h) Loss of smell</b><br><b>i) Loss of sense of taste</b><br>j) Loss of appetite<br>k) Diarrhoea<br>l) Headache<br>m) Vomiting<br>n) Don't know of any<br>o) Other (specify)  | Responses including all of 'Fever', 'Cough', 'Loss of smell', and 'Loss of sense of taste' were coded as 'yes' for this variable.                                                |
| <b>Aware of main modes of transmission</b>  | Q: What are the ways in which the new corona virus (COVID-19) can be spread from person to person<br>a) Droplets from coughing and sneezing<br>b) Touching other people who have the virus<br>c) Touching surfaces which have the virus on<br>d) Touching your eyes, nose, or mouth with unclean hands<br>e) Body fluids from an infected person<br>f) Faeces of an infected<br>g) Don't know of any<br>h) Others (specify) | Respondents who answered yes to all three of; 'Droplets from coughing or sneezing', 'touching eyes/ears/nose or mouth when unclean' and 'touching surfaces' were coded as 'yes'. |
| <b>Relocated</b>                            | Q: Have you taken any of the following steps to shield or self-isolate yourself from becoming infected with the COVID-19 virus at any time since April 2020?<br><b>a) Working from home</b><br><b>b) Relocating to rural home</b><br><b>c) self-isolated at home</b><br><b>d) other (specify)</b><br><b>e) NA -under 50 &amp; no health condition</b>                                                                       | Respondents who answered yes to 'Relocating to rural home' were coded as having relocated                                                                                        |
| <b>Isolated</b>                             | Q: Have you taken any of the following steps to shield or self-isolate yourself from becoming infected with the COVID-19 virus at any time since April 2020?<br><b>f) Working from home</b><br><b>g) Relocating to rural home</b><br><b>h) Self-isolated at home</b><br><b>i) other (specify)</b><br><b>NA -under 50 &amp; no health condition</b>                                                                          | Respondents who answered yes to 'Working from home' or 'Self-isolated at home' were coded as having isolated.                                                                    |
| <b>Wore a facemask outside</b>              | Q: In the LAST 2 WEEKS, how many times did you?<br>a) Wear a face mask outside:<br><ul style="list-style-type: none"> <li>• Most of the times</li> <li>• Some of the times</li> <li>• Seldom</li> <li>• Never</li> </ul>                                                                                                                                                                                                    |                                                                                                                                                                                  |

---

|                                                                              |                                                                                                                                                                                                                                         |                                                          |
|------------------------------------------------------------------------------|-----------------------------------------------------------------------------------------------------------------------------------------------------------------------------------------------------------------------------------------|----------------------------------------------------------|
| <b>Ever tested for COVID-19</b>                                              | Q: On how many different occasions have you been tested for infection with the COVID-19 virus? <ul style="list-style-type: none"><li>• never tested = 99</li></ul>                                                                      |                                                          |
| <b>No perceived chance of becoming infected with Covid in next 12 months</b> | Q: What are the chances you will get infected with the COVID-19 virus in the next 12 months? <ul style="list-style-type: none"><li>• Certain /almost certain</li><li>• High</li><li>• Moderate</li><li>• Small</li><li>• None</li></ul> | Those answering 'None' were coded as 'no perceived risk' |
| <b>Vaccinated against COVID-19</b>                                           | Q: Have you received the COVID-19 vaccine yourself? <ul style="list-style-type: none"><li>• YES</li><li>• NO</li><li>• Don't Know</li><li>• Covid-19 vaccine not available yet</li></ul>                                                |                                                          |

---
