# Supplementary material for: The impact of COVID-19 on sexual risk behaviour for HIV acquisition in east Zimbabwe: An observational study
Source: PubMed Central journal article supplement (PMC11253984; doi:10.1371/journal.pgph.0003194), 2024-07-17
Supplement: pgph.0003194.s009.pdf [file pgph.0003194.s009.pdf]

S5 Table. Demographic characteristics of HIV negative females aged 15-54 in Manicaland, prior to and during three periods of the Covid-19 pandemic survey.

| B) Females                                     | Pre-Covid-19         | During Covid-19 - Period 1 |                    |        | During Covid-19 - Period 2 |                    |        | During Covid-19 - Period 3 |                    |        |
|------------------------------------------------|----------------------|----------------------------|--------------------|--------|----------------------------|--------------------|--------|----------------------------|--------------------|--------|
|                                                | % (95%CI)*<br>N=4135 | % (95%CI)<br>N=635         | AOR† (95%CI)       | p      | % (95%CI)<br>N=1785        | AOR† (95%CI)       | p      | % (95%CI)<br>N=1121        | AOR† (95%CI)       | p      |
| <b>Age Group</b>                               |                      |                            |                    |        |                            |                    |        |                            |                    |        |
| 15-19                                          | 21.5 (20.4 - 22.7)   | 19.7 (16.8 - 23.0)         |                    |        | 19.7 (17.9 - 21.6)         |                    |        | 23.0 (20.6 - 25.6)         |                    |        |
| 20-24                                          | 18.8 (17.7 - 19.9)   | 15.3 (12.7 - 18.3)         |                    |        | 15.5 (13.9 - 17.3)         |                    |        | 16.8 (14.7 - 19.1)         |                    |        |
| 25-29                                          | 13.8 (12.7 - 15.0)   | 15.4 (12.8 - 18.5)         |                    |        | 14.5 (12.9 - 16.2)         |                    |        | 14.1 (12.2 - 16.3)         |                    |        |
| 30-34                                          | 13.7 (12.6 - 14.9)   | 11.3 (9.09 - 14.1)         |                    |        | 12.3 (10.9 - 13.9)         |                    |        | 13.4 (11.5 - 15.5)         |                    |        |
| 35-44                                          | 20.2 (18.9 - 21.5)   | 22.7 (19.6 - 26.1)         |                    |        | 23.6 (21.7 - 25.7)         |                    |        | 21.1 (18.8 - 23.6)         |                    |        |
| 45-54                                          | 12.0 (10.9 - 13.1)   | 15.6 (13.0 - 18.6)         |                    |        | 14.4 (12.8 - 16.1)         |                    |        | 11.6 (9.85 - 13.6)         |                    |        |
| <b>Site type</b>                               |                      |                            |                    |        |                            |                    |        |                            |                    |        |
| Urban                                          | 18.7 (17.6 - 20.0)   | 27.6 (24.2 - 31.2)         | 1.69 (1.40 - 2.05) | <0.001 | 23.0 (21.1 - 25.0)         | 1.32 (1.15 - 1.51) | <0.001 | 9.37 (7.79 - 11.2)         | 0.45 (0.36 - 0.55) | <0.001 |
| Periurban                                      | 28.1 (26.7 - 29.5)   | 29.4 (26.0 - 33.1)         | 1.08 (0.89 - 1.29) | 0.44   | 21.6 (19.7 - 23.5)         | 0.70 (0.62 - 0.81) | <0.001 | 44.8 (41.9 - 47.7)         | 2.08 (1.81 - 2.38) | <0.001 |
| Estates                                        | 21.9 (20.7 - 23.3)   | 23.5 (20.3 - 26.9)         | 1.08 (0.88 - 1.31) | 0.48   | 24.7 (22.8 - 26.8)         | 1.15 (1.01 - 1.32) | 0.03   | 14.4 (12.4 - 16.5)         | 0.60 (0.50 - 0.72) | <0.001 |
| Rural                                          | 31.2 (29.8 - 32.7)   | 19.5 (16.6 - 22.8)         | 0.53 (0.43 - 0.65) | <0.001 | 30.8 (28.7 - 32.9)         | 0.97 (0.86 - 1.10) | 0.63   | 31.5 (28.8 - 34.3)         | 1.01 (0.88 - 1.17) | 0.84   |
| <b>Marital Status</b>                          |                      |                            |                    |        |                            |                    |        |                            |                    |        |
| Never Married                                  | 23.8 (22.6 - 25.1)   | 23.6 (20.5 - 27.1)         | 1.27 (0.97 - 1.68) | 0.09   | 23.0 (21.1 - 25.0)         | 1.21 (1.01 - 1.46) | 0.04   | 25.4 (23.0 - 28.1)         | 1.07 (0.86 - 1.32) | 0.54   |
| Married/cohabiting                             | 64.8 (63.3 - 66.2)   | 65.2 (61.4 - 68.8)         | 0.94 (0.77 - 1.16) | 0.57   | 63.2 (60.9 - 65.4)         | 0.81 (0.71 - 0.92) | 0.002  | 61.5 (58.6 - 64.3)         | 0.86 (0.73 - 1.01) | 0.07   |
| Divorced/separated                             | 8.58 (7.73 - 9.52)   | 7.56 (5.74 - 9.89)         | 0.80 (0.58 - 1.10) | 0.17   | 10.6 (9.24 - 12.1)         | 1.22 (1.01 - 1.48) | 0.04   | 10.0 (8.37 - 11.9)         | 1.21 (0.96 - 1.52) | 0.11   |
| Widowed                                        | 2.80 (2.30 - 3.40)   | 3.62 (2.42 - 5.40)         | 1.16 (0.72 - 1.89) | 0.54   | 3.25 (2.52 - 4.18)         | 1.03 (0.73 - 1.45) | 0.87   | 3.12 (2.25 - 4.32)         | 1.18 (0.78 - 1.78) | 0.43   |
| <b>Household Wealth Index‡</b>                 |                      |                            |                    |        |                            |                    |        |                            |                    |        |
| Poorest                                        | 8.97 (8.12 - 9.90)   | 10.6 (8.39 - 13.2)         | 1.65 (1.23 - 2.21) | 0.001  | 6.96 (5.87 - 8.24)         | 0.81 (0.65 - 1.01) | 0.07   | 4.11 (3.09 - 5.44)         | 0.36 (0.26 - 0.49) | <0.001 |
| 2nd Poorest                                    | 40.3 (38.8 - 41.9)   | 48.5 (44.6 - 52.4)         | 1.86 (1.54 - 2.23) | <0.001 | 39.9 (37.6 - 42.2)         | 1.01 (0.90 - 1.15) | 0.83   | 39.9 (37.1 - 42.8)         | 0.96 (0.84 - 1.11) | 0.61   |
| 3rd Poorest                                    | 24.0 (22.7 - 25.4)   | 31.0 (27.5 - 34.7)         | 1.31 (1.09 - 1.58) | 0.004  | 28.3 (26.2 - 30.4)         | 1.19 (1.05 - 1.35) | 0.01   | 26.3 (23.8 - 28.9)         | 1.22 (1.05 - 1.43) | 0.01   |
| 4th Poorest                                    | 25.0 (23.7 - 26.3)   | 9.92 (7.82 - 12.5)         | 0.22 (0.16 - 0.29) | <0.001 | 23.6 (21.7 - 25.6)         | 0.86 (0.75 - 1.00) | 0.05   | 28.6 (26.0 - 31.3)         | 1.28 (1.09 - 1.51) | 0.003  |
| Least Poor                                     | 1.70 (1.34 - 2.15)   | 0                          | -                  | -      | 1.29 (0.86 - 1.94)         | 0.82 (0.50 - 1.32) | 0.41   | 1.16 (0.67 - 1.99)         | 0.59 (0.32 - 1.08) | 0.09   |
| <b>Highest Level of Education Achieved¶</b>    |                      |                            |                    |        |                            |                    |        |                            |                    |        |
| None/Primary                                   | 16.9 (15.8 - 18.1)   | 18.7 (15.9 - 22.0)         | 1.11 (0.89 - 1.39) | 0.36   | 17.1 (15.4 - 18.9)         | 0.99 (0.85 - 1.15) | 0.85   | 18.8 (16.6 - 21.2)         | 1.25 (1.05 - 1.49) | 0.01   |
| Secondary/Higher                               | 83.1 (81.9 - 84.2)   | 81.3 (78.0 - 84.1)         | 0.90 (0.72 - 1.12) | 0.36   | 82.9 (81.1 - 84.6)         | 1.01 (0.87 - 1.18) | 0.85   | 81.2 (78.8 - 83.4)         | 0.80 (0.67 - 0.96) | 0.01   |
| <b>Employment</b>                              |                      |                            |                    |        |                            |                    |        |                            |                    |        |
| Professional or managerial                     | 3.63 (3.06 - 4.30)   | 2.52 (1.55 - 4.08)         | 0.59 (0.35 - 1.01) | 0.05   | 4.26 (3.41 - 5.30)         | 1.10 (0.82 - 1.48) | 0.52   | 6.60 (5.29 - 8.21)         | 1.77 (1.30 - 2.41) | <0.001 |
| Self-employed: small business                  | 0.46 (0.29 - 0.76)   | 2.20 (1.31 - 3.69)         | 4.47 (2.14 - 9.33) | <0.001 | 1.51 (1.04 - 2.20)         | 3.24 (1.73 - 6.09) | <0.001 | 0.98 (0.54 - 1.76)         | 2.75 (1.25 - 6.04) | 0.01   |
| Skilled labour                                 | 2.34 (1.90 - 2.89)   | 2.36 (1.43 - 3.88)         | 0.92 (0.52 - 1.61) | 0.77   | 4.59 (3.71 - 5.67)         | 1.86 (1.36 - 2.55) | <0.001 | 5.62 (4.41 - 7.13)         | 2.98 (2.11 - 4.21) | <0.001 |
| Manual / unskilled labour                      | 4.42 (3.80 - 5.13)   | 5.20 (3.72 - 7.22)         | 1.12 (0.75 - 1.67) | 0.57   | 9.41 (8.14 - 10.9)         | 2.16 (1.71 - 2.72) | <0.001 | 6.69 (5.37 - 8.31)         | 1.98 (1.48 - 2.67) | <0.001 |
| Informal employment                            | 13.7 (12.6 - 14.8)   | 25.2 (22.0 - 28.7)         | 2.03 (1.64 - 2.50) | <0.001 | 17.8 (16.1 - 19.7)         | 1.31 (1.12 - 1.53) | 0.001  | 16.8 (14.7 - 19.1)         | 1.24 (1.03 - 1.50) | 0.02   |
| Student                                        | 15.2 (14.3 - 16.3)   | 13.9 (11.4 - 16.8)         | 1.03 (0.74 - 1.42) | 0.87   | 15.2 (13.6 - 17.0)         | 1.24 (1.00 - 1.52) | 0.05   | 16.3 (14.3 - 18.6)         | 1.03 (0.81 - 1.31) | 0.79   |
| Unemployed                                     | 52.5 (51.0 - 54.1)   | 48.7 (44.8 - 52.6)         | 0.89 (0.75 - 1.06) | 0.19   | 47.2 (44.9 - 49.5)         | 0.81 (0.72 - 0.91) | <0.001 | 47.0 (44.1 - 49.9)         | 0.81 (0.71 - 0.93) | 0.003  |
| Other: unspecified                             | 7.64 (6.84 - 8.53)   |                            |                    |        |                            |                    |        |                            |                    |        |
| <b>Alcohol/Drugs</b>                           |                      |                            |                    |        |                            |                    |        |                            |                    |        |
| Drank Alcohol in the past year                 | 2.01 (1.62 - 2.50)   | 1.26 (0.63 - 2.50)         | 0.56 (0.27 - 1.17) | 0.12   | 2.46 (1.84 - 3.30)         | 1.23 (0.85 - 1.80) | 0.27   | 2.94 (2.10 - 4.11)         | 1.53 (1.01 - 2.33) | 0.05   |
| Visited Bar, beerhall or shebeen in past month | 0.62 (0.42 - 0.91)   | 0.31 (0.08 - 1.25)         | 0.50 (0.12 - 2.11) | 0.34   | 0.50 (0.26 - 0.97)         | 0.89 (0.42 - 1.92) | 0.77   | 0.98 (0.54 - 1.76)         | 1.27 (0.62 - 2.60) | 0.51   |
| Using drugs for pleasure                       | 0.19 (0.10 - 0.39)   | 0.16 (0.02 - 1.11)         | 0.86 (0.11 - 7.00) | 0.89   | 0.39 (0.19 - 0.82)         | 2.13 (0.76 - 5.95) | 0.15   | 0.36 (0.13 - 0.95)         | 1.82 (0.54 - 6.17) | 0.34   |
| <b>Females 15-19</b>                           |                      |                            |                    |        |                            |                    |        |                            |                    |        |
| Currently Enrolled in Education                | 57.7 (54.8 - 60.6)   | 45.6 (37.0 - 54.5)         | 0.52 (0.33 - 0.83) | 0.006  | 55.56 (50.30 - 60.69)      | 0.96 (0.72 - 1.29) | 0.78   | 64.7 (58.7 - 70.3)         | 1.70 (1.21 - 2.40) | 0.002  |

\* In the cross-sectional analysis of the pre-covid survey, proportions are weighted to account for age bias in selection

† Odds ratios are adjusted for 5 year age group and site type. For variables limited to 15-19 year olds odds ratios are adjusted for site type only.

‡ Household wealth was estimated for each individual by assessing asset ownership within their household and attributing a score as described by Schur et al.19 Each asset variable was transformed into scores between 0 and 1. The values of each asset variable were then summed and divided by the total number of assets giving an overall score between 0 and 1. Equally spaced cut offs (0,0.2, 0.4, 0.6, 0.8) were used to categorise the overall wealth of a household into five groups.

¶ Education variable inconsistently coded in during covid survey - for cohort individuals (in both analyses), education was updated based on answer pre-covid if level of education was higher in R7.

|| These individuals answered 'other' for their category of employment but then did not specify in the follow up question so they could not be recoded to any of the other categories.
