# Supplementary material for: The impact of COVID-19 on sexual risk behaviour for HIV acquisition in east Zimbabwe: An observational study
Source: PubMed Central journal article supplement (PMC11253984; doi:10.1371/journal.pgph.0003194), 2024-07-17
Supplement: pgph.0003194.s010.pdf [file pgph.0003194.s010.pdf]

S6 Table. Population effects and responses to the Covid-19 pandemic amongst HIV negative adults aged 15-54 in Manicaland during three periods of the Covid-19 pandemic survey from February to July 2021.

|                                                                       | Overall<br>% (95%CI) | Period 1<br>% (95%CI) | Period 2<br>% (95%CI) | AOR (95%CI)*        | p value | Period 3<br>% (95%CI) | AOR (95%CI)*       | p value |
|-----------------------------------------------------------------------|----------------------|-----------------------|-----------------------|---------------------|---------|-----------------------|--------------------|---------|
| <b>A) Males</b>                                                       |                      |                       |                       |                     |         |                       |                    |         |
| <b>15-19yrs enrolled in education</b>                                 | <b>N=716</b>         | <b>N=105</b>          | <b>N=309</b>          |                     |         | <b>N=302</b>          |                    |         |
| Missed School due to Covid-19                                         | 94.3 (91.8 - 96.1)   | 84.6 (73.5 - 91.6)    | 93.4 (88.7 - 96.2)    | 2.40 (0.97 - 5.91)  | 0.06    | 98.1 (95.1 - 99.3)    | 8.85 (2.53 - 30.9) | 0.001   |
| <b>15-54yrs</b>                                                       | <b>N=2773</b>        | <b>N=418</b>          | <b>N=1233</b>         |                     |         | <b>N=1122</b>         |                    |         |
| Aware of 4 main symptoms of Covid-19                                  | 75.8 (74.2 - 77.4)   | 71.5 (67.0 - 75.7)    | 73.7 (71.2 - 76.1)    | 1.12 (0.87 - 1.44)  | 0.37    | 79.8 (77.3 - 82.0)    | 1.36 (1.05 - 1.78) | 0.02    |
| Aware of main modes of transmission                                   | 88.4 (87.1 - 89.5)   | 80.6 (76.5 - 84.1)    | 87.3 (85.4 - 89.1)    | 1.70 (1.25 - 2.30)  | 0.001   | 92.3 ( 90.6 - 93.8)   | 2.40 (1.70 - 3.38) | <0.001  |
| Relocated                                                             | 5.70 (4.89 - 6.62)   | 9.57 (7.09 - 12.8)    | 6.00 (4.80 - 7.47)    | 0.58 (0.38 - 0.87)  | 0.01    | 3.92 (2.93 - 5.23)    | 0.45 (0.29 - 0.72) | 0.001   |
| Isolated                                                              | 21.0 (19.5 - 22.5)   | 30.9 (26.6 - 35.5)    | 22.1 (19.8 - 24.5)    | 0.60 (0.47 - 0.78)  | <0.001  | 16.0 (14.0 - 18.3)    | 0.55 (0.42 - 0.72) | <0.001  |
| Wore a facemask outside                                               | 96.6 (95.9 - 97.2)   | 96.4 (94.1 - 97.8)    | 96.4 (95.1 - 97.3)    | 0.96 (0.53 - 1.75)  | 0.90    | 97.0 (95.8 - 97.8)    | 1.13 (0.60 - 2.14) | 0.70    |
| Ever tested for COVID-19                                              | 9.20 (8.17 - 10.3)   | 9.09 (6.68 - 12.3)    | 8.76 (7.30 - 10.5)    | 0.89 (0.60 - 1.32)  | 0.56    | 9.71 (8.11 - 11.6)    | 1.41 (0.94 - 2.12) | 0.09    |
| No perceived chance of becoming infected with Covid in next 12 months | 60.9 (59.0 - 62.8)   | 63.0 (58.1 - 67.6)    | 59.3 (56.5 - 62.1)    | 0.83 (0.65 - 1.06)  | 0.13    | 61.9 (58.9 - 64.7)    | 0.84 (0.66 - 1.08) | 0.18    |
| Vaccinated against COVID-19                                           | 10.5 (9.37 - 11.7)   | 1.91 (0.96 - 3.79)    | 7.46 (6.12 - 9.07)    | 4.16 (1.99 - 8.66)  | <0.001  | 16.9 (14.8 - 19.2)    | 11.3 (5.47 - 23.3) | <0.001  |
| <b>B) Females</b>                                                     |                      |                       |                       |                     |         |                       |                    |         |
| <b>15-19yrs enrolled in education</b>                                 | <b>N=734</b>         | <b>N=125</b>          | <b>N=351</b>          |                     |         | <b>N=258</b>          |                    |         |
| Missed School due to Covid-19                                         | 95.2 (92.7 - 96.9)   | 94.7 (84.6 - 98.3)    | 93.3 (88.8 - 96.1)    | 0.82 (0.22 - 3.06)  | 0.77    | 97.6 (93.8 - 99.1)    | 2.62 (0.55 - 12.4) | 0.22    |
| <b>15-54yrs</b>                                                       | <b>N=3541</b>        | <b>N=635</b>          | <b>N=1785</b>         |                     |         | <b>N=1121</b>         |                    |         |
| Aware of 4 main symptoms of Covid-19                                  | 85.3 (84.1 - 86.4)   | 79.2 (75.9 - 82.2)    | 86.3 (84.6 - 87.8)    | 1.74 (1.37 - 2.21)  | <0.001  | 87.1 (85.0 - 88.9)    | 1.89 (1.45 - 2.47) | <0.001  |
| Aware of main modes of transmission                                   | 96.0 ( 95.3 - 96.6)  | 96.2 (94.4 - 97.5)    | 95.5 (94.5 - 96.4)    | 0.86 (0.54 - 1.37)  | 0.51    | 96.5 (95.3 - 97.4)    | 1.11 (0.66 - 1.89) | 0.69    |
| Relocated                                                             | 3.61 ( 3.05 - 4.28)  | 2.36 (1.43 - 3.88)    | 5.10 (4.17 - 6.22)    | 2.40 (1.37 - 4.22)  | 0.002   | 1.96 (1.30 - 2.96)    | 1.40 (0.71 - 2.77) | 0.33    |
| Isolated                                                              | 40.8 ( 39.2 - 42.5)  | 33.4 (29.8 - 37.2)    | 43.8 (41.5 - 46.1)    | 1.71 (1.40 - 2.09)  | <0.001  | 40.3 (37.5 - 43.2)    | 1.96 (1.57 - 2.44) | <0.001  |
| Wore a facemask outside                                               | 98.4 (97.9 - 98.7)   | 95.7 (93.9 - 97.1)    | 98.8 (98.2 - 99.2)    | 3.52 (1.95 - 6.34)  | <0.001  | 99.1 (98.3 - 99.5)    | 6.78 (3.22 - 14.3) | <0.001  |
| Ever tested for COVID-19                                              | 11.1 ( 10.1 - 12.1)  | 9.13 (7.12 - 11.6)    | 9.08 (7.83 - 10.5)    | 1.05 (0.76 - 1.44)  | 0.77    | 15.3 (13.3 - 17.6)    | 1.93 (1.40 - 2.67) | <0.001  |
| No perceived chance of becoming infected with Covid in next 12 months | 56.8 ( 55.1 - 58.4)  | 54.4 (50.5 - 58.4)    | 59.1 (56.7 - 61.4)    | 1.22 (1.01 - 1.48)  | 0.04    | 54.3 (51.3 - 57.3)    | 0.93 (0.75 - 1.14) | 0.47    |
| Vaccinated against COVID-19                                           | 11.3 ( 10.3 - 12.4)  | 1.73 (0.96 - 3.10)    | 7.39 (6.27 - 8.71)    | 5.10 (2.73 - 9.54)  | <0.001  | 22.9 (20.6 - 25.5)    | 17.9 (9.66 - 33.3) | <0.001  |
| <b>C) All adults</b>                                                  |                      |                       |                       |                     |         |                       |                    |         |
| <b>15-19yrs</b>                                                       | <b>N=1450</b>        | <b>N=230</b>          | <b>N=660</b>          |                     |         | <b>N=560</b>          |                    |         |
| Missed School due to Covid-19                                         | 94.8 ( 93.1 - 96.1)  | 89.3 (82.4 - 93.7)    | 93.4 (90.3 - 95.5)    | 1.63 (0.80 - 3.34)  | 0.18    | 97.9 (95.8 - 98.9)    | 5.88 (2.31 - 15.0) | <0.001  |
| <b>15-54yrs</b>                                                       | <b>N=6314</b>        | <b>N=1053</b>         | <b>N=3018</b>         |                     |         | <b>N=2243</b>         |                    |         |
| Aware of 4 main symptoms of Covid-19                                  | 81.1 ( 80.1 - 82.1)  | 76.2 (73.5 - 78.6)    | 81.1 (79.7 - 82.5)    | 1.38 (1.16 - 1.63)  | <0.001  | 83.4 (81.8 - 84.9)    | 1.50 (1.24 - 1.80) | <0.001  |
| Aware of main modes of transmission                                   | 92.6 ( 91.9 - 93.2)  | 90.0 (88.1 - 91.7)    | 92.2 (91.2 - 93.1)    | 1.31 (1.03 - 1.68)  | 0.03    | 94.4 (93.4 - 95.3)    | 1.62 (1.23 - 2.14) | 0.001   |
| Relocated                                                             | 4.53 ( 4.04 - 5.07)  | 5.22 (4.03 - 6.74)    | 5.47 (4.71 - 6.34)    | 1.04 (0.76 - 1.43)  | 0.79    | 2.94 (2.32 - 3.73)    | 0.75 (0.52 - 1.10) | 0.14    |
| Isolated                                                              | 32.1 ( 31.0 - 33.3)  | 32.4 (29.6 - 35.3)    | 34.9 (33.2 - 36.6)    | 1.14 ( 0.98 - 1.33) | 0.09    | 28.2 (26.4 - 30.1)    | 1.08 (0.91 - 1.27) | 0.39    |
| Wore a facemask outside                                               | 97.6 ( 97.2 - 97.9)  | 96.0 (94.6 - 97.0)    | 97.8 (97.2 - 98.3)    | 1.84 (1.24 - 2.74)  | 0.002   | 98.0 (97.4 - 98.5)    | 2.25 (1.45 - 3.50) | <0.001  |
| Ever tested for COVID-19                                              | 10.2 ( 9.52 - 11.0)  | 9.12 (7.52 - 11.0)    | 8.95 (7.98 - 10.0)    | 1.00 (0.78 - 1.28)  | 0.99    | 12.5 (11.2 - 14.0)    | 1.67 (1.29 - 2.14) | <0.001  |
| No perceived chance of becoming infected with Covid in next 12 months | 58.6 (57.3 - 59.8)   | 57.8 (54.7 - 60.8)    | 59.2 (57.4 - 61.0)    | 1.03 (0.89 - 1.20)  | 0.66    | 58.1 (56.0 - 60.2)    | 0.94 (0.80 - 1.10) | 0.42    |
| Vaccinated against COVID-19                                           | 10.9 (10.2 - 11.7)   | 1.80 (1.15 - 2.81)    | 7.42 (6.54 - 8.41)    | 4.69 (2.92 - 7.55)  | <0.001  | 19.9 (18.3 - 21.6)    | 14.7 (9.15 - 23.5) | <0.001  |

\* Odds ratios are adjusted for 5 year age group and site type. For variables limited to 15-19 year olds odds ratios are adjusted for site type only.
