# Supplementary material for: The impact of COVID-19 on sexual risk behaviour for HIV acquisition in east Zimbabwe: An observational study
Source: PubMed Central journal article supplement (PMC11253984; doi:10.1371/journal.pgph.0003194), 2024-07-17
Supplement: pgph.0003194.s011.pdf [file pgph.0003194.s011.pdf]

S7 Table. Sexual Risk Behaviours of HIV negative adults aged 15-54 in Manicaland, prior to and during three periods of the Covid-19 pandemic survey.

|                                                | Pre-Covid-19<br>% (95%CI)* | During Covid-19 - Period 1 |                    |      | During Covid-19 - Period 2 |                    |        | During Covid-19 - Period 3 |                    |       |
|------------------------------------------------|----------------------------|----------------------------|--------------------|------|----------------------------|--------------------|--------|----------------------------|--------------------|-------|
|                                                |                            | % (95%CI)                  | AOR† (95%CI)       | p    | % (95%CI)                  | AOR† (95%CI)       | p      | % (95%CI)                  | AOR† (95%CI)       | p     |
| <b>A) Males</b>                                |                            |                            |                    |      |                            |                    |        |                            |                    |       |
| <b>15-19yrs</b>                                | <b>N=986</b>               | <b>N=105</b>               |                    |      | <b>N=309</b>               |                    |        | <b>N=302</b>               |                    |       |
| Had sexual debut (15-19yrs)                    | 10.8 (8.96 - 12.8)         | 17.1 (11.0 - 25.7)         | 1.66 (0.95 - 2.88) | 0.07 | 12.9 (9.63 - 17.2)         | 1.21 (0.82 - 1.79) | 0.34   | 11.6 (8.43 - 15.7)         | 1.15 (0.76 - 1.74) | 0.51  |
| <b>15-54yrs started sex</b>                    | <b>N=2050</b>              | <b>N=313</b>               |                    |      | <b>N=874</b>               |                    |        | <b>N=776</b>               |                    |       |
| Multiple partners in past 1 month              | 5.93 (4.97 - 7.06)         | 3.19 (1.72 - 5.85)         | 0.49 (0.25 - 0.94) | 0.03 | 5.15 (3.86 - 6.83)         | 0.79 (0.55 - 1.13) | 0.19   | 4.90 (3.58 - 6.66)         | 0.88 (0.60 - 1.28) | 0.50  |
| Multiple partners in past 12 months            | 17.8 (16.2 - 19.5)         | 18.2 (14.3 - 22.9)         | 1.01 (0.74 - 1.39) | 0.93 | 20.1 (17.6 - 22.9)         | 1.12 (0.91 - 1.37) | 0.29   | 15.2 (12.8 - 17.9)         | 0.89 (0.70 - 1.12) | 0.31  |
| Concurrent partners                            | 6.62 (5.61 - 7.81)         | 7.03 (4.66 - 10.5)         | 1.04 (0.65 - 1.66) | 0.88 | 7.55 (5.97 - 9.50)         | 1.11 (0.81 - 1.51) | 0.52   | 5.54 (4.13 - 7.39)         | 0.90 (0.63 - 1.29) | 0.56  |
| 1 or more non-regular partner in the past year | 19.3 (17.6 - 21.0)         | 19.5 (15.5 - 24.3)         | 1.02 (0.74 - 1.41) | 0.88 | 22.0 (19.3 - 24.8)         | 1.18 (0.96 - 1.46) | 0.12   | 18.4 (15.9 - 21.3)         | 1.08 (0.86 - 1.35) | 0.53  |
| Transactional Sex                              | 7.39 (6.31 - 8.64)         | 8.95 (6.24 - 12.7)         | 1.26 (0.83 - 1.94) | 0.28 | 7.09 (5.57 - 9.00)         | 0.97 (0.71 - 1.33) | 0.87   | 5.54 (4.13 - 7.39)         | 0.79 (0.55 - 1.13) | 0.19  |
| STI symptoms in past 12 months                 | 3.12 (2.44 - 3.97)         | 1.92 (0.86 - 4.21)         | 0.54 (0.23 - 1.27) | 0.16 | 1.14 (0.62 - 2.11)         | 0.29 (0.15 - 0.58) | <0.001 | 1.55 (0.88 - 2.71)         | 0.54 (0.28 - 1.01) | 0.05  |
| <b>Risk Category‡</b>                          | <b>N=3181</b>              | <b>N=418</b>               |                    |      | <b>N=1233</b>              |                    |        | <b>N=1122</b>              |                    |       |
| Not sexually active                            | 30.4 (28.9 - 32.0)         | 25.1 (21.2 - 29.5)         | 0.66 (0.45 - 0.97) | 0.04 | 29.1 (26.6 - 31.7)         | 1.01 (0.80 - 1.29) | 0.91   | 30.8 (28.2 - 33.6)         | 1.02 (0.79 - 1.31) | 0.88  |
| Low risk                                       | 50.7 (48.9 - 52.5)         | 52.4 (47.6 - 57.2)         | 0.96 (0.74 - 1.25) | 0.78 | 49.6 (46.8 - 52.3)         | 0.88 (0.74 - 1.05) | 0.16   | 52.0 (49.1 - 55.0)         | 1.00 (0.84 - 1.20) | 0.96  |
| Medium risk                                    | 5.49 (4.70 - 6.41)         | 7.89 (5.66 - 10.9)         | 1.41 (0.94 - 2.11) | 0.09 | 5.76 (4.59 - 7.21)         | 1.04 (0.77 - 1.40) | 0.80   | 4.37 (3.31 - 5.73)         | 0.82 (0.58 - 1.15) | 0.25  |
| High risk                                      | 13.4 (12.3 - 14.7)         | 14.6 (11.5 - 18.3)         | 1.14 (0.84 - 1.54) | 0.40 | 15.6 (13.7 - 17.7)         | 1.16 (0.95 - 1.41) | 0.14   | 12.7 (10.9 - 14.8)         | 1.07 (0.86 - 1.32) | 0.55  |
| <b>B) Females</b>                              |                            |                            |                    |      |                            |                    |        |                            |                    |       |
| <b>15-19yrs</b>                                | <b>N=1112</b>              | <b>N=125</b>               |                    |      | <b>N=351</b>               |                    |        | <b>N=258</b>               |                    |       |
| Had sexual debut (15-19yrs)                    | 29.7 (27.1 - 32.4)         | 20.0 (13.8 - 28.0)         | 0.57 (0.36 - 0.91) | 0.02 | 19.7 (15.8 - 24.2)         | 0.57 (0.43 - 0.77) | <0.001 | 21.3 (16.7 - 26.8)         | 0.69 (0.50 - 0.96) | 0.03  |
| <b>15-54yrs started sex</b>                    | <b>N=3172</b>              | <b>N=516</b>               |                    |      | <b>N=1428</b>              |                    |        | <b>N=864</b>               |                    |       |
| Multiple partners in past 1 month              | 1.06 (0.76 - 1.49)         | 0.58 (0.19 - 1.79)         | 0.52 (0.16 - 1.72) | 0.29 | 0.77 (0.43 - 1.39)         | 0.80 (0.40 - 1.59) | 0.52   | 1.27 (0.71 - 2.29)         | 1.00 (0.50 - 2.01) | 0.99  |
| Multiple partners in past 12 months            | 6.07 (5.29 - 6.95)         | 2.33 (1.32 - 4.05)         | 0.37 (0.21 - 0.67) | 0.00 | 3.29 (2.48 - 4.35)         | 0.56 (0.40 - 0.78) | 0.00   | 4.05 (2.92 - 5.59)         | 0.65 (0.45 - 0.95) | 0.03  |
| Concurrent partners                            | 1.03 (0.73 - 1.45)         | 0.39 (0.10 - 1.54)         | 0.34 (0.08 - 1.44) | 0.14 | 0.77 (0.43 - 1.39)         | 0.78 (0.39 - 1.57) | 0.50   | 1.27 (0.71 - 2.29)         | 1.05 (0.52 - 2.12) | 0.89  |
| 1 or more non-regular partner in the past year | 8.30 (7.40 - 9.30)         | 6.78 (4.91 - 9.31)         | 0.92 (0.63 - 1.33) | 0.64 | 6.93 (5.72 - 8.37)         | 0.95 (0.74 - 1.21) | 0.67   | 8.33 (6.66 - 10.4)         | 1.11 (0.84 - 1.48) | 0.45  |
| Transactional Sex                              | 6.90 (6.06 - 7.84)         | 3.68 (2.36 - 5.71)         | 0.55 (0.34 - 0.90) | 0.02 | 5.60 (4.52 - 6.92)         | 0.83 (0.64 - 1.09) | 0.18   | 6.37 (4.92 - 8.20)         | 0.92 (0.67 - 1.25) | 0.60  |
| Age disparate relationship 5 years or more     | 61.2 (59.5 - 62.9)         | 61.5 (57.2 - 65.7)         | 1.10 (0.90 - 1.34) | 0.35 | 62.1 (59.6 - 64.6)         | 1.11 (0.98 - 1.27) | 0.11   | 61.3 (58.0 - 64.5)         | 1.07 (0.91 - 1.25) | 0.43  |
| Age disparate relationship 10 years or more    | 21.8 (20.4 - 23.3)         | 21.7 (18.3 - 25.5)         | 1.00 (0.80 - 1.27) | 0.97 | 22.7 (20.6 - 25.0)         | 1.03 (0.89 - 1.21) | 0.66   | 19.0 (16.5 - 21.8)         | 0.84 (0.69 - 1.02) | 0.08  |
| STI symptoms in past 12 months                 | 7.54 (6.66 - 8.53)         | 9.50 (7.25 - 12.4)         | 1.26 (0.91 - 1.75) | 0.17 | 7.91 (6.62 - 9.43)         | 1.05 (0.82 - 1.33) | 0.71   | 6.02 (4.61 - 7.82)         | 0.89 (0.65 - 1.21) | 0.45  |
| <b>Risk Category‡</b>                          | <b>N=4135</b>              | <b>N=635</b>               |                    |      | <b>N=1785</b>              |                    |        | <b>N=1121</b>              |                    |       |
| Not sexually active                            | 18.8 (17.8 - 20.0)         | 18.7 (15.9 - 22.0)         | 1.31 (0.95 - 1.81) | 0.10 | 20.0 (18.2 - 21.9)         | 1.60 (1.30 - 1.97) | <0.001 | 22.9 (20.6 - 25.5)         | 1.53 (1.20 - 1.95) | 0.001 |
| Low risk                                       | 70.1 (68.7 - 71.5)         | 72.9 (69.3 - 76.2)         | 1.01 (0.79 - 1.28) | 0.96 | 71.3 (69.2 - 73.4)         | 0.89 (0.76 - 1.04) | 0.15   | 66.9 (64.1 - 69.6)         | 0.80 (0.67 - 0.96) | 0.02  |
| Medium risk                                    | 4.32 (3.72 - 5.01)         | 2.83 (1.79 - 4.46)         | 0.67 (0.41 - 1.10) | 0.11 | 3.14 (2.42 - 4.06)         | 0.70 (0.52 - 0.96) | 0.03   | 3.75 (2.78 - 5.03)         | 0.90 (0.63 - 1.27) | 0.54  |
| High risk                                      | 6.73 (6.00 - 7.55)         | 5.51 (3.98 - 7.59)         | 0.85 (0.59 - 1.22) | 0.37 | 5.55 (4.57 - 6.71)         | 0.85 (0.67 - 1.08) | 0.18   | 6.42 (5.13 - 8.02)         | 1.02 (0.77 - 1.34) | 0.90  |

\* In the cross-sectional analysis of the pre-covid survey, proportions are weighted to account for age bias in selection

† Odds ratios are adjusted for 5 year age group and site type. For variables limited to 15-19 year olds odds ratios are adjusted for site type only. AORs are compared to the Pre-Covid-19 survey.

‡ Low risk = no risk behaviors, Medium risk = concurrent partners, more than one partner in the past 12 months, transactional sex, High risk = non-regular partners
