# Supplementary material for: The impact of COVID-19 on sexual risk behaviour for HIV acquisition in east Zimbabwe: An observational study
Source: PubMed Central journal article supplement (PMC11253984; doi:10.1371/journal.pgph.0003194), 2024-07-17
Supplement: pgph.0003194.s014.pdf [file pgph.0003194.s014.pdf]

### S3 Text. Periodic cross-sectional analysis.

Data from the During-Covid-19 survey were split into three periods for analysis reflecting the progression of the Covid-19 pandemic in Zimbabwe. Period 1 covered February and March 2021, Period 2: April and May 2021 and Period 3: June and July 2021.

The results of this analysis can be found in Tables S4-S7.
